# Supplementary material
Source: Research Square preprint supplement (doi:10.21203/rs.3.rs-9652623/v1)
Supplement: Supplementary file 1 [file 9464bf43b62348d099740a39.pdf]

# Supplementary Information for: A Geometric Mechanism for Critical Transitions Through Dimensional Saturation

May 2, 2026

## Supplementary Table 1 — Evidence Mapping: Core Claims to Mathematical Proofs

---

| Core Claim                                                                                                                     | Mathematical Formalism                             | Validation |
|--------------------------------------------------------------------------------------------------------------------------------|----------------------------------------------------|------------|
| <b>Geometric Isomorphism</b>                                                                                                   | Section S1: <i>Proof of CUD-Kekeya Equivalence</i> |            |
| Derivation of the constraint from the Lyapunov function. Linking $W_{\text{percept}}$ to geometric measure bounds. Fig. S1, S2 |                                                    |            |
| <b>Biological Scaling</b>                                                                                                      | Section S2: <i>Perceptual Field Optimization</i>   |            |
| Solution of the weighted integral equation under maximum entropy constraints . Fig. S3                                         |                                                    |            |
| <b>Stability Threshold</b>                                                                                                     | Section S3: <i>Weighted Lyapunov Stability</i>     |            |
| Proof of the critical gain $k_d$ . Derivation of the edge of collapse. Fig. S4                                                 |                                                    |            |
| <b>Active Rescue</b>                                                                                                           | Section S4: <i>Control Barrier Function</i>        |            |
| Proof of $V_{\text{weighted}}(t)$ convergence under constraint violation. Fig. S5                                              |                                                    |            |
| <b>Universality</b>                                                                                                            | Section S5: <i>Renormalization Group Flow</i>      |            |
| Derivation of the universal exponent from the geometric constraint. Fig. S6                                                    |                                                    |            |

---

# 1 Derivation of Perceptual Weights from Maximum Entropy Principle

Following the principle of maximum entropy subject to finite energy constraints, the probability distribution of the perceptual variable  $\mathbf{r}$  (spatial displacement vector in  $\mathbb{R}^2$ ) is derived. This approach ensures that our model makes the least assumptions beyond the known constraints, providing a robust statistical foundation for the CUD framework.

The entropy is defined as:

$$S = - \int p(\mathbf{r}) \ln p(\mathbf{r}) d\mathbf{r} \quad (1)$$

Subject to the constraint  $\int p(\mathbf{r}) \|\mathbf{r}\|^2 d\mathbf{r} = \sigma_d^2$  (where  $\sigma_d^2$  is the perceptual variance parameter) and normalization  $\int p(\mathbf{r}) d\mathbf{r} = 1$ , we introduce the Lagrangian function:

$$\mathcal{L} = - \int p(\mathbf{r}) \ln p(\mathbf{r}) d\mathbf{r} - \lambda_1 \left( \int p(\mathbf{r}) \|\mathbf{r}\|^2 d\mathbf{r} - \sigma_d^2 \right) - \lambda_2 \left( \int p(\mathbf{r}) d\mathbf{r} - 1 \right) \quad (2)$$

Applying variational calculus ( $\delta\mathcal{L}/\delta p = 0$ ) yields the Gaussian distribution  $p(\mathbf{r}) \propto \exp(-\lambda_1 \|\mathbf{r}\|^2)$ . This naturally leads to the decomposition of the perceptual weight  $W_{\text{percept}}$  based on spatial distance  $d = \|\mathbf{r}\|$  and field-of-view angle  $\theta$ , with  $\theta_{\text{FOV}}$  denoting the maximum field-of-view angle:

$$W_{\text{distance}} = \exp\left(-\frac{d^2}{2\sigma_d^2}\right) \quad (3)$$

$$W_{\text{angle}} = \left(1 - \frac{|\theta|}{\theta_{\text{FOV}}}\right)_+ \quad (4)$$

where  $(\cdot)_+$  denotes the ReLU function, ensuring non-negative weights.

Thus, the combined perceptual weight used in the control law is given by:

$$W_{\text{percept}}(\mathbf{P}_i) = W_{\text{distance}} \cdot W_{\text{angle}} = \exp\left(-\frac{d^2}{2\sigma_d^2}\right) \left(1 - \frac{|\theta|}{\theta_{\text{FOV}}}\right)_+ \quad (5)$$

where  $\mathbf{P}_i$  denotes the position of agent  $i$ .

## 2 Weighted Lyapunov Stability Analysis

We analyze the system stability using a weighted Lyapunov function  $V(\mathbf{x}) = \frac{1}{2} \sum_{i=1}^N \|\mathbf{e}_i\|^2$ , where  $\mathbf{e}_i$  is the error vector for agent  $i$  (defined as  $\mathbf{e}_i = \mathbf{x}_i - \mathbf{x}_d$  with  $\mathbf{x}_d$  being the desired state). The derivative of the weighted Lyapunov function along the system trajectories is:

$$\dot{V}_{\text{weighted}} = \sum_{i=1}^N W_{\text{percept}}(\mathbf{P}_i) \dot{\mathbf{e}}_i \cdot \mathbf{e}_i \quad (6)$$

Considering the system dynamics  $\dot{\mathbf{e}}_i = -k_d \mathbf{e}_i + \boldsymbol{\eta}_i$  with control input  $\mathbf{u}_i = -k_d \mathbf{e}_i$  and bounded noise  $\boldsymbol{\eta}_i$  (where  $\|\boldsymbol{\eta}_i\| \leq \epsilon$  for all  $i$ ), the derivative becomes:

$$\dot{V}_{\text{weighted}} \leq -k_d \sum_{i=1}^N W_{\text{percept}}(\mathbf{P}_i) \|\mathbf{e}_i\|^2 + \epsilon \sum_{i=1}^N W_{\text{percept}}(\mathbf{P}_i) \|\mathbf{e}_i\| \quad (7)$$

For the noise-free case ( $\epsilon = 0$ ), the condition for asymptotic stability ( $\dot{V}_{\text{weighted}} < 0$ ) requires:

$$k_d \sum_{i=1}^N W_{\text{percept}}(\mathbf{P}_i) \|\mathbf{e}_i\|^2 > 0 \quad (8)$$

In the presence of bounded noise, the ultimate error bound is given by:

$$\|\mathbf{e}_i\| \leq \frac{N\epsilon}{k_d W_{\text{percept}}(\mathbf{P}_i) - \delta} \quad (9)$$

where  $\delta > 0$  is a small constant ensuring positivity of the denominator. This implies that for the error to remain bounded, the denominator must be positive, leading to the necessary condition on the control gain  $k_d$ .

### 3 Critical Threshold of Control Gain $k_d$

We distinguish between linear inhibition and non-linear (Sigmoid) inhibition mechanisms. Here  $W_i \equiv W_{\text{percept}}(\mathbf{P}_i)$  for notational brevity.

#### 3.1 Linear Inhibition

For a linear inhibition function, the system is dissipative for any positive gain.

**Proposition 3.1.** *(Stability under Linear Inhibition) If the inhibition function is linear, the condition  $k_d > 0$  is sufficient to ensure  $\dot{V}_{\text{weighted}} \leq 0$ , guaranteeing system stability in the Lyapunov sense.*

#### 3.2 Sigmoid Inhibition and Critical Gain

For biological systems, the inhibition follows a Sigmoid function  $\sigma(\cdot)$  with maximum slope  $\beta/4$  (where  $\beta$  represents the steepness parameter).

**Theorem 3.1.** *(Critical Gain for Sigmoid Inhibition) Let the inhibition function be modeled as a Sigmoid function with maximum slope  $\beta/4$ . The system remains stable if and only if the control gain  $k_d$  satisfies:*

$$k_d > \frac{\beta}{4 \min_i(W_i)} \quad (10)$$

where  $\min_i(W_i)$  is the minimum perceptual weight among active agents ( $W_i > 0$ ).

*Proof.* The derivative of the Lyapunov function with Sigmoid inhibition involves the term  $\sigma'(x)$ . Since  $\sigma'(x) \leq \beta/4$  for all  $x$ , the destabilizing term in the derivative is bounded by  $\frac{\beta}{4} \sum_{i=1}^N \|e_i\|^2$ . To ensure  $\dot{V} < 0$ , the control term  $k_d \sum_{i=1}^N W_i \|e_i\|^2$  must dominate the destabilizing term:

$$k_d \min_i(W_i) \sum_{i=1}^N \|e_i\|^2 > \frac{\beta}{4} \sum_{i=1}^N \|e_i\|^2 \quad (11)$$

Simplifying this inequality yields the critical threshold:

$$k_d > \frac{\beta}{4 \min_i(W_i)} \quad (12)$$

□

**Remark 3.1.** *This result highlights a fundamental trade-off: as the perceptual field becomes sparse (i.e.,  $\min_i(W_i) \rightarrow 0$  due to occlusion or large distances), the required control gain  $k_d$  approaches infinity. This defines the edge of collapse for the multi-agent system.*
